# Supplementary material
Source: PubMed Central journal article supplement (PMC4822567)
Supplement: pnas.1602472113.sapp.pdf [file pnas.1602472113.sapp.pdf]

1 **Supplementary Information:**

2

3 **Molecular basis for inhibition of AcrB multidrug efflux pump by novel and**  
4 **powerful pyranopyridine derivatives**

5 Hanno Sjuts<sup>1</sup>, Attilio V. Vargiu<sup>2\*</sup>, Steven M. Kwasny<sup>3</sup>, Son T. Nguyen<sup>3</sup>, Hong-Suk  
6 Kim<sup>4</sup>, Xiaoyuan Ding<sup>3</sup>, Alina R. Ornik<sup>1</sup>, Paolo Ruggerone<sup>2</sup>, Terry L. Bowlin<sup>3</sup>, Hiroshi  
7 Nikaido<sup>4\*</sup>, Klaas M. Pos<sup>1\*</sup>, Timothy J. Opperman<sup>3\*</sup>

8 <sup>1</sup>Institute of Biochemistry, Goethe Universität Frankfurt, Max-von-Laue-Straße 9, D-  
9 60438 Frankfurt, Germany

10 <sup>2</sup>Department of Physics, University of Cagliari, S.P. Monserrato-Sestu Km 0.700, I-  
11 09042 Monserrato (CA), Italy

12 <sup>3</sup>Microbiotix, Inc., One Innovation Dr., Worcester, MA 01605 USA

13 <sup>4</sup>University of California Berkeley, 16 Barker Hall # 3202, Berkeley, CA 94720-3202  
14 USA

15 \*Corresponding author. E-mail: [topperman@microbiotix.com](mailto:topperman@microbiotix.com) (T.J.O.); [pos@em.uni-](mailto:pos@em.uni-frankfurt.de)  
16 [frankfurt.de](mailto:pos@em.uni-frankfurt.de) (K.M.P.); [vargiu@dsf.unica.it](mailto:vargiu@dsf.unica.it) (A.V.V.); [nhiroshi@berkeley.edu](mailto:nhiroshi@berkeley.edu) (H.N.)

17

18 Materials and Methods

19 Figures S1-6

20 Tables 1-4

21 References

22

## 23 **Materials and Methods:**

24

### 25 *Bacterial strains, growth media, and reagents.*

26 The bacterial strains that were used in this study are listed in Extended Data Table 6.  
27 Luria Broth (Miller) and agar were purchased as prepared dehydrated media from  
28 Becton Dickenson (Franklin Lakes, NJ). Ciprofloxacin (CIP) was purchased from ICN  
29 Biomedicals (Aurora, OH). Hoechst 33342 (H33342) was purchased from Molecular  
30 Probes (Eugene, OR). The following reagents were purchased from Sigma Aldrich  
31 (St. Louis, MO): levofloxacin (LVX), piperacillin (PIP), tazobactam, minocycline  
32 (MIN), nitrocefin. The pyranopyridine efflux pump inhibitors (MBX2319, MBX2931,  
33 MBX3132 and MBX3135) were synthesized as described (1).

34

### 35 *Antibacterial assays.*

36 Assays to measure the Minimum Inhibitory Concentration (MIC) of antibacterial  
37 agents were performed as described in the CLSI guidelines (CLSI 2006) with  
38 modifications described previously (2). Checkerboard assays measuring the minimal  
39 concentration of an Efflux Pump Inhibitor (EPI) required to decrease the MIC of an  
40 antibiotic by 4-fold (MPC4) and time kill assays were conducted as described (2).

41

### 42 *Efflux assays.*

43 The H33342 accumulation assay was used to evaluate the effect of EPIs on the  
44 activity of the AcrAB-TolC efflux pump in several bacterial species essentially as  
45 described(3). The effects of EPIs on the kinetic parameters of nitrocefin efflux  
46 catalyzed by AcrAB-TolC in *E. coli* were estimated using the  $\beta$ -lactamase assay(4).

47

### 48 *AcrBper cloning.*

49 Two independent PCR reactions were performed to amplify the coding regions for  
50 the N- and C-terminal periplasmic loop regions Ala39-Thr329 and Ser561-Ser869,  
51 respectively, from a plasmid containing the wild-type *acrB* gene as template, using  
52 the primers

53

54 AcrBper1\_f: 5'-ATATATGCTCTTCT\*AGT**GCACCGCCGGCAGTAACG**-3';

55 AcrBper1\_r: 5'-**GGATCCGCCTGAACCGCCGGTGTTCGTATGGGTAAAC**-3';

56 AcrBper2\_f: 5'-GGATCC**GGCGGTTCAAGCTCCTTCTTGCCAGATG**-3';

57 AcrBper2\_r: 5'-TATATAGCTCTTCA\***TGCGGAGGAGAGACGTTCTGATAGG**-3'.

58

59 The two PCR products were ligated together *via* the inserted *Bam*HI restriction site  
60 (underlined).

61 This generates a glycine/serine linker (amino acid sequence GSGSGSGS,  
62 nucleotides belonging to the glycine/serine linker are shown in bold) connecting both  
63 periplasmic loops (bold underlined nucleotides belong to *acrB*). The fragment  
64 exchange (FX) cloning technique was conducted to insert the ligated PCR product  
65 into the cloning vector pINITIAL using the *Sap*I restriction enzyme (5). The *Sap*I  
66 recognition site is shown in italics and its cleavage site is indicated with an asterisk.  
67 The sequence-verified *acrBper* DNA was subcloned *via* the FX cloning technique  
68 into the expression vector pBXCPCD (a kind gift from Emanuele Marine, Goethe  
69 University Frankfurt), containing an arabinose inducible promoter. AcrBper is  
70 expressed covalently fused to a Cysteine Protease Domain (CPD), and a C-terminal  
71 His<sub>10</sub> tag. The protease activity of the CPD is highly specific for its N-terminal A-L-A-

72 D-G-K sequence and requires the presence of inositol hexakisphosphate (IP6) for  
73 protease activity. Upon addition of IP6, the CPD autocatalytically removes itself and  
74 the His<sub>10</sub> tag by proteolytic cleavage of the the L-A peptide bond (6).

75

#### 76 *AcrBper expression.*

77 *E. coli* MC1061 cells were transformed with the pBXCPD::*acrBper* plasmid and  
78 plated on LB-agar supplemented with 100 µg/ml ampicillin. A single colony was used  
79 to inoculate an overnight starting culture, which was incubated at 37 °C while  
80 rigorously shaking. The overnight culture was used to inoculate (1:500 dilution) the  
81 main culture (one liter of 2x YT, supplemented with ampicillin), which was grown at  
82 37 °C, 110 rpm until an OD<sub>600</sub> of 0.8 was reached. Protein overexpression was  
83 induced by adding 0.002 % (w/v) L-arabinose (Roth) and cells were grown for  
84 additional four hours at 37°C. Cells were harvested by centrifugation (6,000 rpm, 15  
85 minutes) and stored at -20°C until use.

86

#### 87 *AcrBper purification.*

88 Cell pellets were resuspended in buffer A (50 mM HEPES, pH 7, 300 mM NaCl; 5  
89 ml×g<sup>-1</sup> wet weight), supplemented with phenylmethylsulfonylfluoride (PMSF; 0.1  
90 mM), DNase (10 µg/ml) and lysozyme (10 µg/ml; all from Sigma) and stirred on ice  
91 for 30 minutes. Cells were lysed by a single passage through an automated cell  
92 disruptor at 20 kPsi and non-soluble material was removed by centrifugation (30,000  
93 rpm, Beckman 45Ti rotor, 45 minutes, 4 °C). All purification steps were performed at  
94 4 °C. Imidazole (15 mM final concentration; Sigma) was added to the supernatant  
95 and loaded onto a NiNTA agarose (Qiagen) column (bed volume 1.5 ml), pre-  
96 equilibrated with buffer A containing 15 mM imidazole. After washing the column with  
97 buffer A containing first 30 mM imidazole (15 column volumes) and then without  
98 imidazole (15 column volumes), CPD-mediated cleavage between AcrBper and  
99 CPD-His<sub>10</sub> was initiated by the addition of 15 ml buffer A supplemented with 150 µM  
100 IP6. The cleavage reaction was conducted for 16 hours at mild sample agitation.  
101 Liberated AcrBper was collected in the flow-through fraction and concentrated using  
102 a 30 kDa cut-off Amicon spin concentrator centrifuged at 4,000 rpm. Size-exclusion  
103 chromatography on a Superdex 200 column (GE Healthcare) equilibrated with buffer  
104 B (10 mM HEPES, pH 7, 150 mM NaCl) was used as final purification step of  
105 AcrBper. Overexpression and purification of DARPin clone 1108\_19 was done as  
106 previously described(7) except for the final purification step of the DARPin's, which  
107 was done using a Superdex 200 column and buffer B (see above) as running buffer.

108

#### 109 *Crystallization.*

110 Crystallization trials of AcrBper were set up at 18 °C using vapor diffusion  
111 techniques. Drops contained 1.5 µl of AcrBper/DARPin solution (equimolar ratio,  
112 13.5 mg/ml total protein concentration) and 1.5 µl of precipitant solution over 800 µl  
113 precipitant solution in the reservoir well. Rod shaped crystals were obtained using  
114 0.1 M MES pH6.5, 0.21 M NaCl, 11.5 % PEG 4000 as reservoir solution and  
115 reached maximum size within 10 - 14 days.

116

#### 117 *Soaking of AcrBper crystals with MBX inhibitors.*

118 All MBX compounds were dissolved in DMSO to a final concentration of 50 mM.  
119 These stock solutions were diluted to 1 mM with the reservoir solution that yielded  
120 crystals of AcrBper. Crystals were transferred into these solutions and incubated for  
121 24 - 72 hours as hanging drops over reservoir solution. Afterwards, the crystals were

122 briefly soaked in a solution composed of reservoir solution supplemented with 15 %  
123 PEG 300 as cryoprotectant, before they were looped, flash-cooled and stored in  
124 liquid nitrogen until measured.

125

126 *Soaking of AcrBper crystals with Minocycline and Rhodamine 6G (R6G).*

127 Minocycline (20 mM, Sigma) and R6G (10 mM, AppliChem) were prepared in 10 mM  
128 HEPES, pH 7, 150 mM NaCl. These stocks were diluted to a 10 mM minocycline and  
129 a 5 mM R6G soaking solution with the reservoir solution used for crystallization.  
130 AcrBper crystals were soaked in these solutions for one week, prior to cryoprotection  
131 as described above.

132

133 *Structure determination.*

134 Crystals were measured on the beamlines, PXIII (Swiss Light Source, Villigen,  
135 Switzerland) and PX1 (Synchrotron SOLEIL, Paris, France) and P13 (Deutsches  
136 Elektronen Synchrotron, Hamburg, Germany). All datasets were reduced and scaled  
137 using XDS(8). Crystals belong to space group  $P2_12_12_1$  with approximate unit cell  
138 dimensions of  $a = 108 \text{ \AA}$ ;  $b = 145 \text{ \AA}$ ;  $c = 174 \text{ \AA}$ . The apo structure of AcrBper was  
139 solved by molecular replacement using PHASER(9) with wild-type AcrB and DARPin  
140 coordinates from the pdb entry 4DX5 as a search model, omitting all atom  
141 coordinates that are not part of AcrBper. The model was improved by iterative cycles  
142 of manual model building in Coot (10) and restrained refinement using REFMAC5  
143 (11). Phases of the ligand bound structures were derived from rigid body refinements  
144 (REFMAC5) using the final model of the AcrBper/DARPin apo coordinates as an  
145 input model and were completed using Coot and REFMAC5 as described above.  
146 Coordinate and restrained definition files for the MBX compounds were generated  
147 using JLIGAND from the CCP4 suite (12). Data collection and refinement statistics  
148 are summarized in Extended Data Table 4. The structure figures were prepared with  
149 PyMOL ([www.pymol.org](http://www.pymol.org)).

150

151 *Molecular dynamics simulations.*

152 Force field parameters for MBX2319 were taken from previous published work (13),  
153 and are now publicly available at the link: <http://www.dsf.unica.it/translocation/db>  
154 (14). The parameters for the remaining inhibitors MBX2931, MBX3132 and  
155 MBX3135 were generated following previously published protocol (15). Namely, the  
156 Marvin package [Marvin 6.2.0, 2014, ChemAxon (<http://www.chemaxon.com>)] was  
157 used to calculate the most likely protonation states of the inhibitors at pH 7.0; all of  
158 them turned out to be neutral in these conditions. The force field parameters were  
159 taken from the GAFF force field (16), and the AMBER14 package (17). Atomic  
160 Restrained Electrostatic Potential (RESP) charges were derived using the  
161 antechamber tool of AMBER, after a structural optimization performed with  
162 Gaussian09 (18) in the presence of implicit solvent (PCM).

163 Four simulations (one for each complex) each of 20 ns in length were performed in  
164 the presence of explicit water solution (0.1 M KCl) using the program AMBER14. The  
165 TIP3P model of water(19) and the monovalent ion parameters appropriate for this  
166 choice were used(20). A time step of 2 fs was used. Pressure and temperature were  
167 regulated at 1 atm and 310 K (after the equilibration phase) using the isotropic  
168 Berendsen barostat(21) and the Langevin thermostat(22), respectively. Periodic  
169 boundary conditions were employed. Electrostatic interactions were evaluated using  
170 the Particle Mesh Ewald scheme with a cutoff of  $9.0 \text{ \AA}$  for the short-range evaluation

171 in direct space. The same cutoff was used for Lennard-Jones interactions (with a  
172 continuum model correction for energy and pressure).

173 In order to guarantee a slow equilibration phase while keeping the asymmetric  
174 structure of AcrBper in accordance to the crystallographic data, the equilibration and  
175 the production runs were performed as followed: In order to rearrange the position of  
176 waters and ions, structural relaxation was performed in the presence of soft  
177 restraints ( $1 \text{ kcal}\cdot\text{mol}^{-1}\cdot\text{\AA}^{-2}$ ) on all the non-hydrogen atoms of the protein and the  
178 ligand. In the second and third steps, the restraints were kept only on backbone and  
179  $C_{\alpha}$  atoms, respectively, and on the non-hydrogen atoms of ligand. Finally, restraints  
180 were removed from the ligand and from a selection of residues having at least one  
181 atom within  $8 \text{ \AA}$  from the ligand. In all steps the structure of the solute from the  
182 previous step was used as target for restraints, and up to 10,000 optimization steps  
183 were performed using the conjugate-gradients algorithm. Next, annealing up to 340  
184 K was performed in 2 ns, using the same setup as in the last step of the relaxation  
185 described at the previous point, and constant volume and temperature conditions  
186 (NVT ensemble). This was followed by quenching to 310 K in 3 ns, and then a 1 ns  
187 long equilibration with same setup as above, but in the NTP ensemble. Finally, a  
188 productive run of 20 ns in length was performed applying partial restraints to the  
189 system, namely to all heavy atoms of the protein but those having at least one atom  
190 within  $8 \text{ \AA}$  from the ligand. The last conformation from previous dynamics was used  
191 as target for structural restraints. The trajectories were saved every 20 ps, resulting  
192 in  $\sim 2000$  conformations for each system.

193 *Post-processing of trajectories.* The free energy of binding of each inhibitor to AcrB  
194 was evaluated using the Molecular Mechanics – Generalized Born Surface Area  
195 (MM-GBSA) post-processing method, through the MMPBSA.py tool of the  
196 AmberTools package(23).

197 According to the MM-GBSA theory, the free energy of binding  $\Delta G_b$  is evaluated  
198 through the following formula:

199

200

$$\Delta G_b = G_{com} - (G_{rec} + G_{lig})$$

201

202 where  $G_{com}$ ,  $G_{rec}$ , and  $G_{lig}$  are the absolute free energies of complex, receptor, and  
203 ligand, respectively, averaged over the equilibrium trajectory of the complex (single  
204 trajectory approach(24–26)). According to these schemes, the free energy difference  
205 can be decomposed as:

206

207

$$\Delta G_b = \Delta E_{MM} + \Delta G_{solv} - T\Delta S_{conf}$$

208

209 where  $\Delta E_{MM}$  is the difference in the molecular mechanics energy,  $\Delta G_{solv}$  is the  
210 solvation free energy, and  $T\Delta S_{conf}$  is the solute conformational entropy. The first two  
211 terms were calculated with the following equations:

212

213

$$\Delta E_{MM} = \Delta E_{bond} + \Delta E_{angle} + \Delta E_{torsion} + \Delta E_{vdw} + \Delta E_{elec}$$

214

$$\Delta G_{solv} = \Delta G_{solv,p} + \Delta G_{solv,np}$$

215

216  $E_{MM}$  includes the molecular mechanics energy contributed by the bonded ( $E_{bond}$ ,  
217  $E_{angle}$ , and  $E_{torsion}$ ) and non-bonded ( $E_{vdw}$  and  $E_{elec}$ , calculated with no cutoff) terms of  
218 the force field.  $\Delta G_{solv}$  is the solvation free energy, which can be modeled as the sum  
219 of an electrostatic contribution ( $\Delta G_{solv,p}$ , evaluated using the MM-GBSA approach)



220 and a non-polar one ( $\Delta G_{\text{solv,np}} = \gamma\Delta S_A + b$ , proportional to the difference in solvent-  
221 exposed surface area,  $\Delta S_A$ ).

222 In the MM-GBSA approach, the electrostatic solvation free energy was calculated  
223 using the implicit solvent model developed in Ref. 48 ( $\text{igb} = 8$  in AMBER14) in  
224 combination with mbondi3 (28, 29) (for H, C, N, O, S elements) and intrinsic (30)  
225 radii. Partial charges were taken from the AMBER/GAFF force fields, and relative  
226 dielectric constants of 1 for solute and 78.4 for the solvent (0.1 M KCl water solution)  
227 were used. The non-polar contribution is approximated by the LCPO (31) method  
228 implemented within the sander module of AMBER. In addition to being faster, the  
229 MM-GBSA approach furnishes an intrinsically easy way of decomposing the free  
230 energy of binding into contributions from single atoms and residues (32), which is  
231 alternative to the “alanine scanning” approach.

232 Solvation free energies were calculated on ~300 frames, extracted from the  
233 production trajectories. The solute conformational entropy contribution ( $T\Delta S_{\text{conf}}$ ) was  
234 not included in the evaluation of the free energy(26).

235 Root Mean Square Fluctuation (RMSF) values were calculated through the cpptraj  
236 module of the AMBER14 package, and temperature factors B were calculated from  
237 the RMSF values using the formula:

238

$$239 \quad B = \frac{8}{3}\pi^2(RMSF)^2$$

240

241 The analyses as well as the atomic-level figures, were performed using tcl scripts  
242 within VMD (33) or utilities of the AMBER package.

243

A

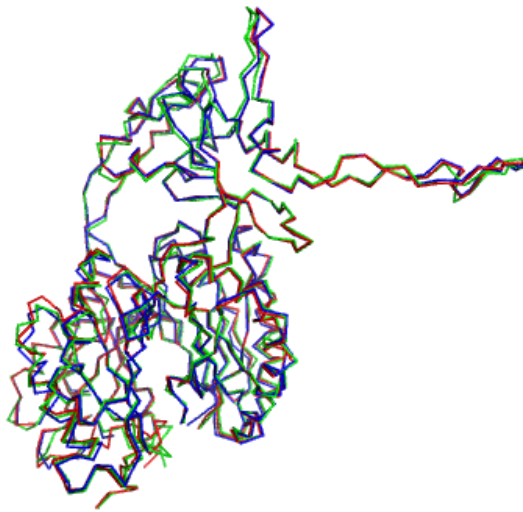

B

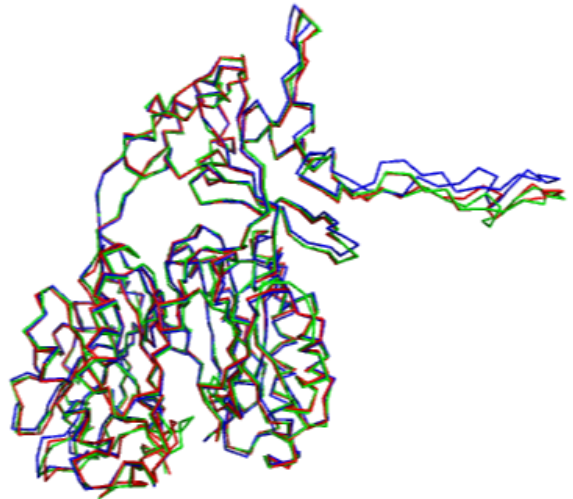

244

245 **Fig. S1. Superimposition between AcrBper and the periplasmic domains of the**  
246 **full-length AcrB crystal forms.** A) Overlay of the Loose protomers with AcrBper  
247 (chain A) in blue, AcrB (pdb entry 4DX5, chain A, (34)) in red and AcrB (pdb entry  
248 2GIF, chain C, (35)) in green. B) Superimposition of the respective Tight protomer  
249 periplasmic domains using the same color coding as in A).

250

251

252

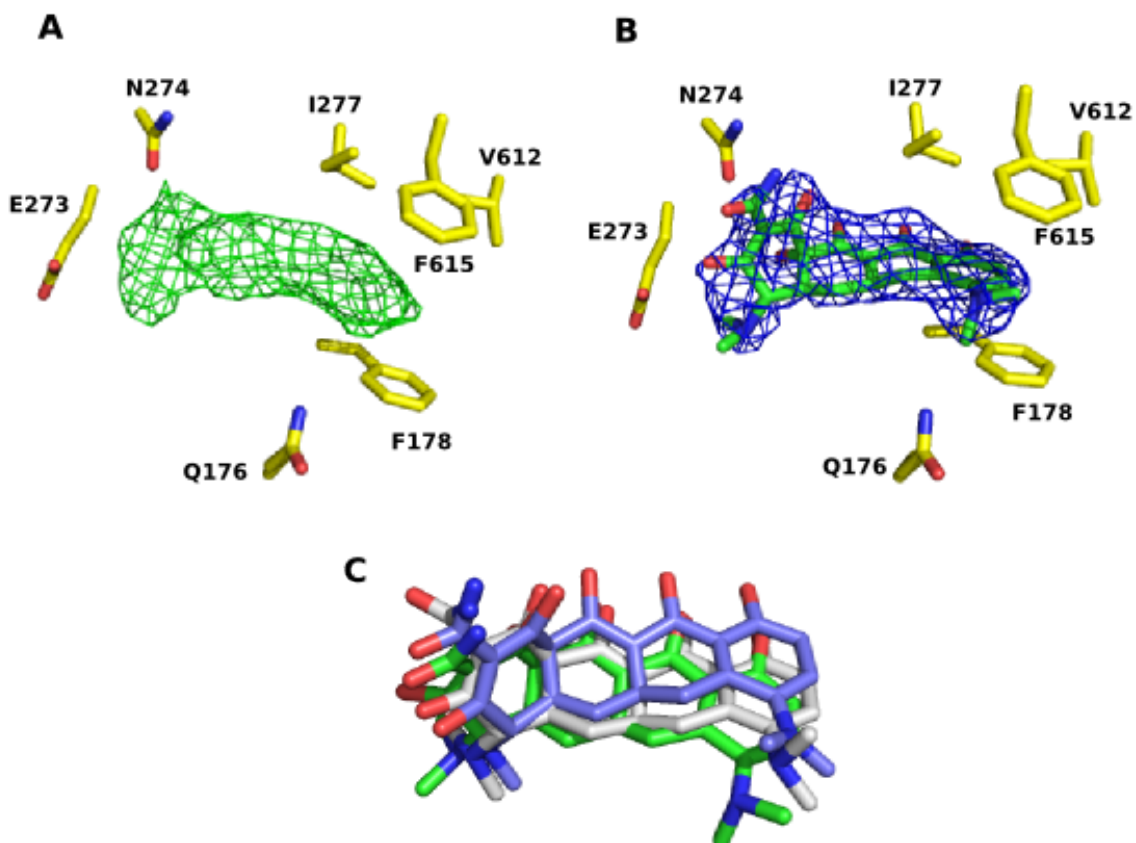

254

255 **Fig. S2. Minocycline (MIN) binding to the deep binding pocket of the AcrB T**  
 256 **monomer.** A) The  $F_o-F_c$  omit map of MIN is shown as green mesh, contoured at  
 257  $3.0\sigma$ . B) The blue mesh (contoured at  $1.0\sigma$ ) represents the MIN  $2F_o-F_c$  density after  
 258 refinement of the complex structure. Side chain residues of the AcrB deep binding  
 259 pocket are shown as sticks (carbon = yellow; oxygen = red; nitrogen = blue). C)  
 260 Superimposition of MIN coordinates as bound to the AcrB deep binding pocket. The  
 261 MIN atom positions were extracted from pdb entry 4DX5 (carbon = light blue; oxygen  
 262 = red; nitrogen = blue(34)); pdb entry 2DRD (carbon = gray; oxygen = red; nitrogen =  
 263 blue(35)); the AcrBper/MIN complex (carbon = green; oxygen = red; nitrogen = blue;  
 264 this study).  
 265



266

267

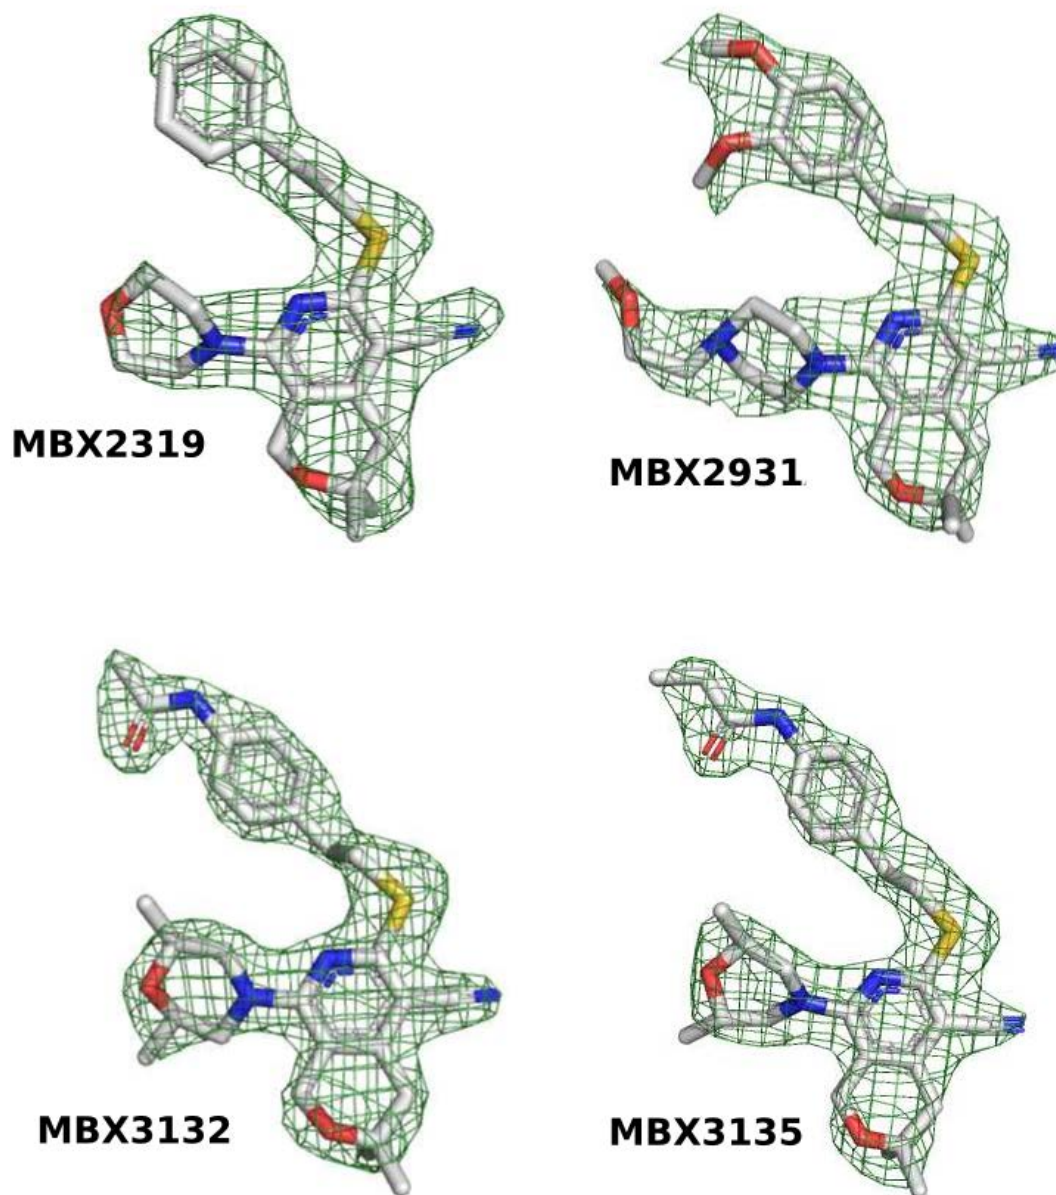

268

269

270 **Fig. S3. Residual positive electron density of MBX2319, MBX2931, MBX3132**

271 **and MBX3135.** The omit  $F_o - F_c$  maps are contoured at  $2.5\sigma$ ,  $3.0\sigma$ ,  $4.0\sigma$  and  $4.0\sigma$  for

272 MBX2319, MBX2931, MBX3132 and MBX3135, respectively. The assigned MBX

273 compounds are shown as sticks (carbon = gray; oxygen = red; nitrogen = blue; sulfur

274 = yellow).

275

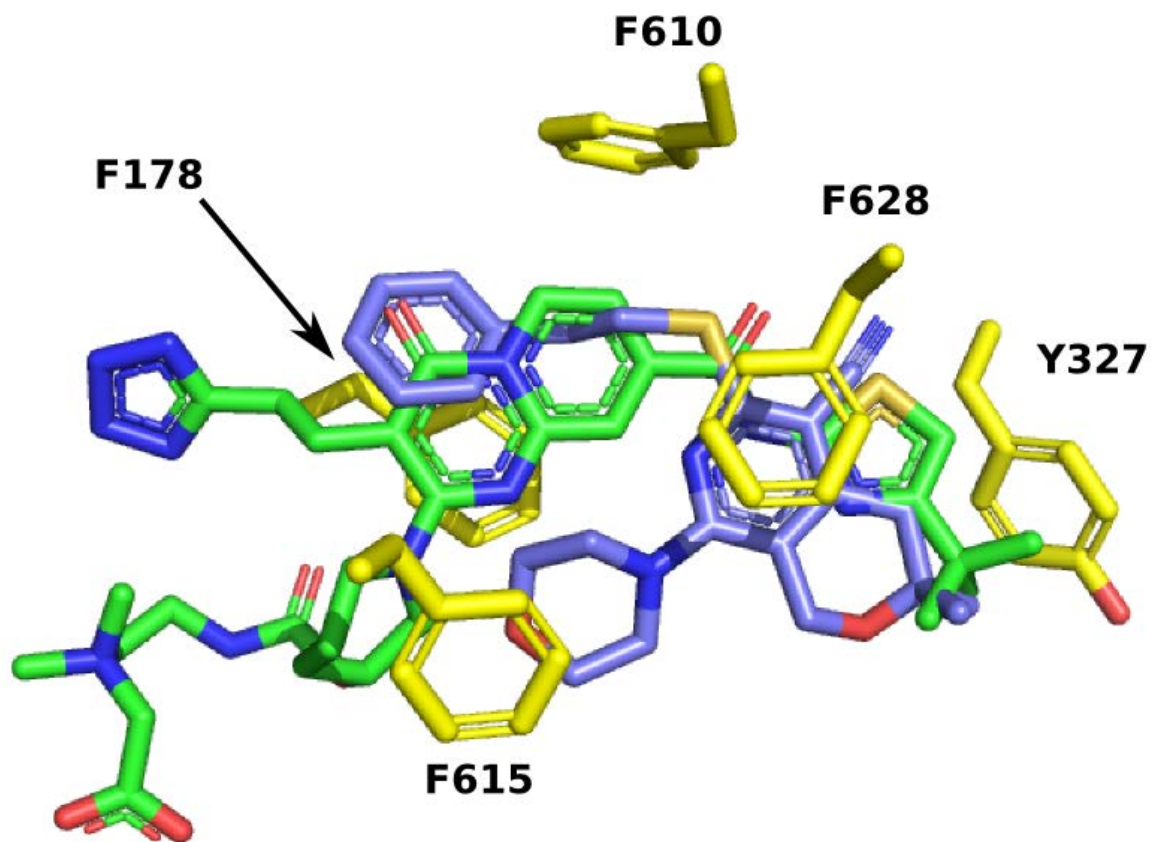

276

277

278 **Fig. S4. Superimposition of MBX2319 and D13-9001 inhibitors bound to AcrB.**  
 279 MBX2319 (carbon = light blue; oxygen = red; nitrogen = blue; sulfur = yellow) and  
 280 D13-9001 (carbon = green; oxygen = red; nitrogen = blue; sulfur = yellow; pdb entry  
 281 3W9H(36)) bind in the deep binding pocket and associated hydrophobic trap of AcrB.  
 282 Protein side chains are shown as sticks (carbon = yellow; oxygen = red).  
 283

284

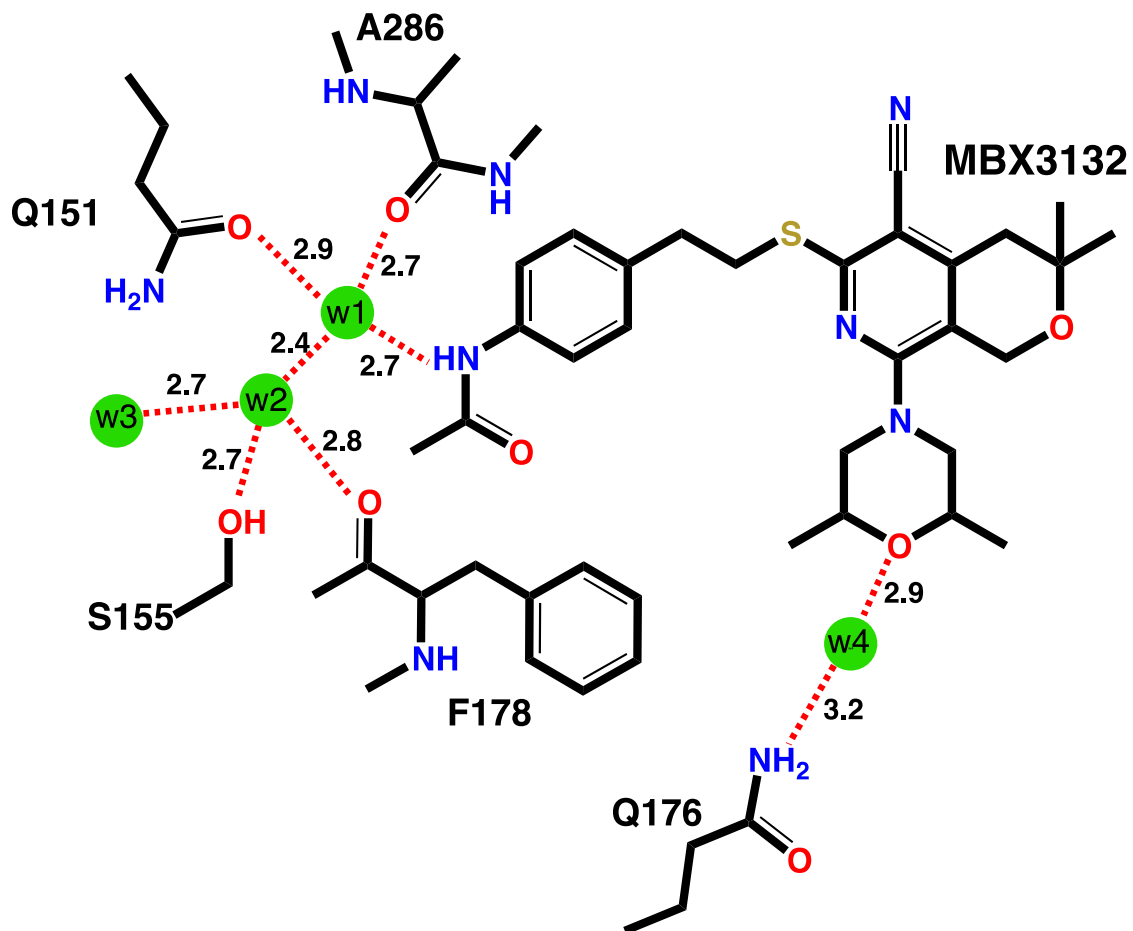

285

286 **Fig. S5. Schematic illustration of the water-mediated hydrogen bond network**  
287 **between MBX3132 and AcrB.** Waters are shown as green circles. Hydrogen bonds  
288 are indicated by red dotted lines with distances given in Å.  
289

MBX2319

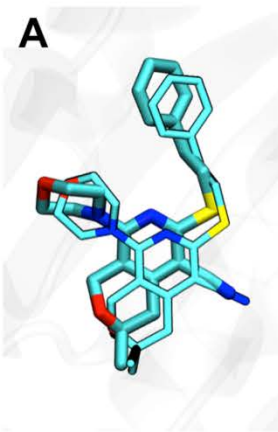

MBX2931

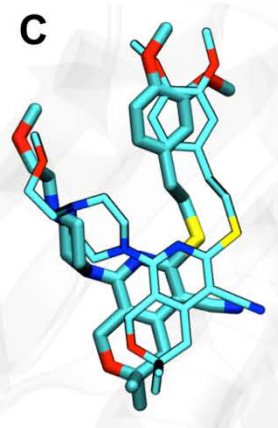

MBX3132

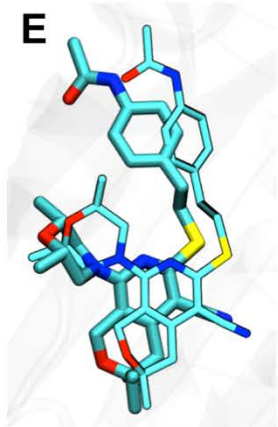

MBX3135

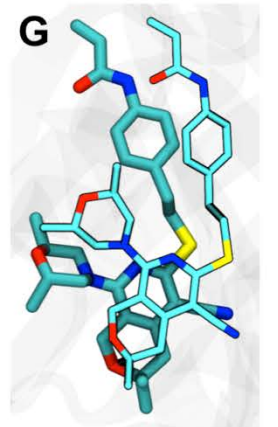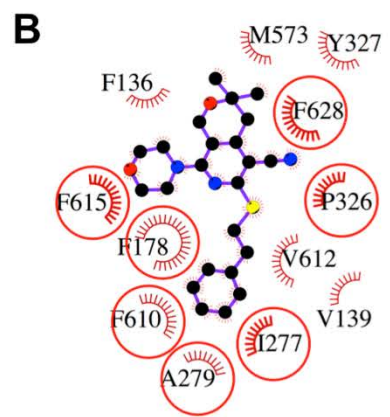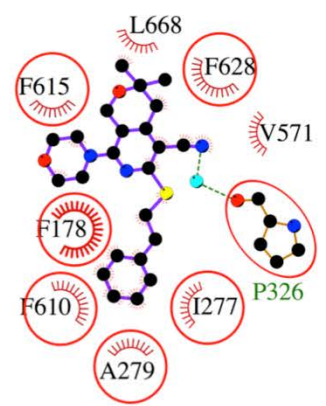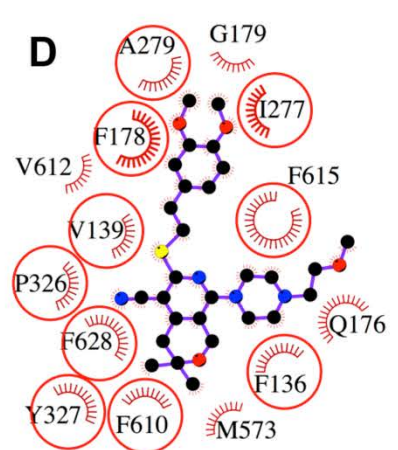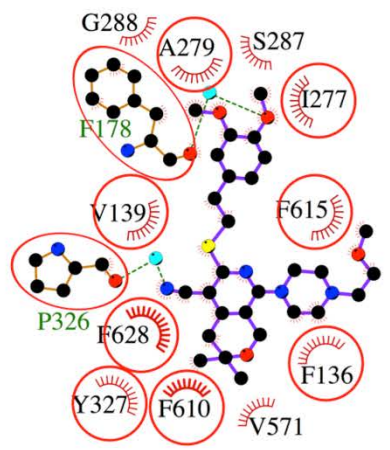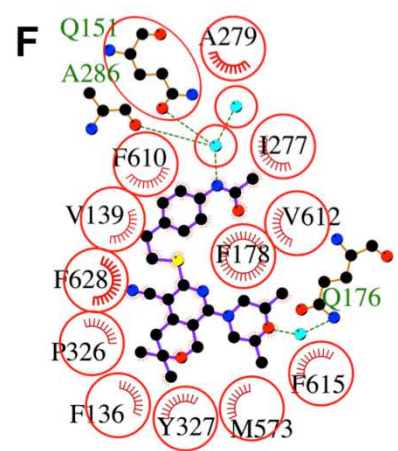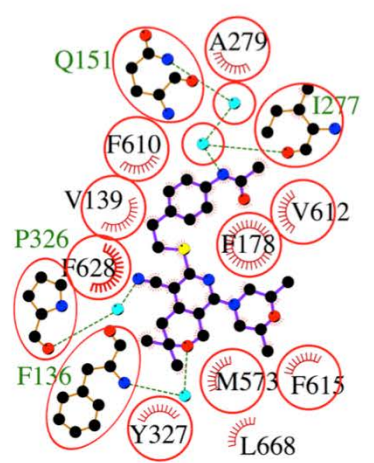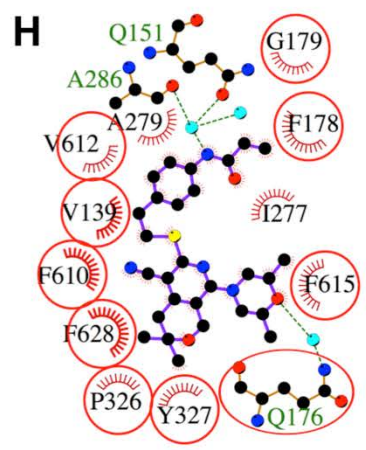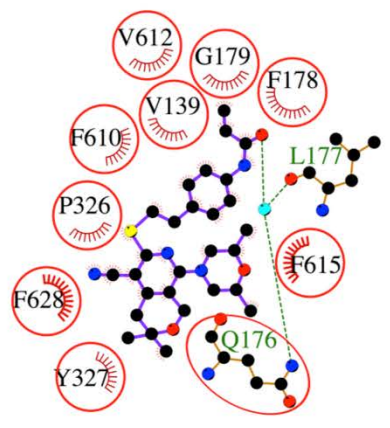



291 **Fig. S6. Comparison between crystal structures determined by X-ray**  
292 **diffraction and most representative conformations extracted from partly**  
293 **restrained MD simulations.** A, C, E, G) Comparison between X-ray and MD  
294 structures for compounds MBX2319, MBX2931, MBX3132 and MBX3135. X-ray and  
295 MD-derived structures are shown with thinner and thicker sticks respectively (carbon  
296 = cyan; oxygen = red; nitrogen = blue, sulfur = yellow). The RMSD values between  
297 X-ray and MD derived positions are 1.2, 1.8, 1.6 and 1.4 Å, respectively. B, D, F, H)  
298 Comparison of interactions between the four MBX compounds and residues at the  
299 AcrB deep binding pocket as represented by LigPlot+ on the X-ray- (left panel) and  
300 MD-derived (right panel) structures. Residues involved in MBX binding as derived  
301 from both techniques are highlighted by red circles.  
302

303 **Table S1. RMSD values between protomers after C $\alpha$ -atom alignment.** Indicated  
 304 in bold are the lowest RMSD values of the AcrBper protomers with the AcrB L and T  
 305 protomers derived from the periplasmic domains from the full-length structures 4DX5  
 306 and 2GIF.  
 307

| Crystal                                                                                 | Monomer   | AcrBper P2 <sub>1</sub> 2 <sub>1</sub> 2 <sub>1</sub> PDB 5EN5 |           |           | AcrB P2 <sub>1</sub> 2 <sub>1</sub> 2 <sub>1</sub> PDB 4DX5 |              |           | AcrB C2 PDB 2GIF |              |           |
|-----------------------------------------------------------------------------------------|-----------|----------------------------------------------------------------|-----------|-----------|-------------------------------------------------------------|--------------|-----------|------------------|--------------|-----------|
|                                                                                         |           | L chain A                                                      | L chain B | T chain C | L chain A                                                   | T chain B    | O chain C | L chain A        | T chain B    | O chain C |
| AcrBper<br>P2 <sub>1</sub> 2 <sub>1</sub> 2 <sub>1</sub><br>PDB 5EN5<br>DARPin<br>bound | L chain A | 0                                                              | 0.242     | 0.869     | <b>0.355</b>                                                | 1.237        | 1.379     | <b>0.537</b>     | 1.228        | 1.690     |
|                                                                                         | L chain B |                                                                | 0         | 0.589     | <b>0.547</b>                                                | 1.193        | 1.366     | <b>0.626</b>     | 1.116        | 1.708     |
|                                                                                         | T chain C |                                                                |           | 0         | 1.131                                                       | <b>0.692</b> | 2.150     | 0.991            | <b>0.659</b> | 2.056     |
| AcrB<br>P2 <sub>1</sub> 2 <sub>1</sub> 2 <sub>1</sub><br>PDB 4DX5<br>DARPin<br>bound    | L chain A |                                                                |           |           | 0                                                           | 2.084        | 2.021     | 0.556            | 2.064        | 2.143     |
|                                                                                         | T chain B |                                                                |           |           |                                                             | 0            | 2.039     | 1.783            | 0.486        | 2.036     |
|                                                                                         | O chain C |                                                                |           |           |                                                             |              | 0         | 1.809            | 1.989        | 0.440     |
| AcrB<br>C2<br>PDB 2GIF<br>DARPin<br>free                                                | L chain A |                                                                |           |           |                                                             |              |           | 0                | 1.706        | 1.835     |
|                                                                                         | T chain B |                                                                |           |           |                                                             |              |           |                  | 0            | 1.856     |
|                                                                                         | O chain C |                                                                |           |           |                                                             |              |           |                  |              | 0         |

308  
 309  
 310



311 **Table S2.** The spectrum of efflux pump inhibitor activity of MBX2319 and selected  
 312 analogs against representative pathogenic *Enterobacteriaceae*.  
 313

| Organism                                    | Drug | MIC<br>( $\mu\text{g/ml}$ ) | MPC4 ( $\mu\text{M}$ ) for MBX#: |           |             |             |
|---------------------------------------------|------|-----------------------------|----------------------------------|-----------|-------------|-------------|
|                                             |      |                             | 2319                             | 2931      | 3132        | 3135        |
| <i>Escherichia coli</i><br>ATCC 700928      | LVX  | 0.06                        | 3.12                             | 12.5      | $\leq 0.19$ | $\leq 0.19$ |
|                                             | TZP  | 2                           | $\geq 12.5$                      | 0.78      | 0.78        | 0.39        |
|                                             | MIN  | 1                           | 3.12                             | 12.5      | $\leq 0.19$ | $\leq 0.19$ |
| <i>E. coli</i><br>331                       | LVX  | 32                          | $\geq 12.5$                      | 0.78      | 0.39        | 0.39        |
|                                             | TZP  | 4                           | 1.56                             | 1.56      | $\leq 0.19$ | $\leq 0.19$ |
|                                             | MIN  | 32                          | 3.12                             | 3.12      | $\leq 0.19$ | $\leq 0.19$ |
| <i>Shigella flexneri</i><br>ATCC 700930     | LVX  | 0.06                        | 6.25                             | $\geq 25$ | $\leq 0.19$ | $\leq 0.19$ |
|                                             | TZP  | 0.5                         | $\geq 12.5$                      | 12.5      | 0.78        | 0.39        |
|                                             | MIN  | 1                           | 6.25                             | 3.12      | 0.78        | $\leq 0.19$ |
| <i>Salmonella enterica</i><br>MDCH06        | LVX  | 0.63                        | $\geq 12.5$                      | 1.56      | 0.39        | $\leq 0.19$ |
|                                             | TZP  | 4                           | 6.25                             | 12.5      | $\leq 0.19$ | $\leq 0.19$ |
|                                             | MIN  | 8                           | 3.12                             | 3.1       | $\leq 0.19$ | $\leq 0.19$ |
| <i>Enterobacter aerogenes</i><br>ATCC 13048 | LVX  | 0.06                        | $\geq 25$                        | 3.1       | 1.56        | $\leq 0.39$ |
|                                             | TZP  | 8                           | $\geq 25$                        | $\geq 25$ | $\geq 25$   | $\geq 25$   |
|                                             | MIN  | 8                           | 1.56                             | 0.78      | $\leq 0.39$ | $\leq 0.39$ |
| <i>Klebsiella pneumoniae</i><br>ATCC 700603 | LVX  | 1                           | 6.25                             | 3.12      | 3.12        | $\leq 0.39$ |
|                                             | TZP  | 40                          | $\geq 25$                        | $\geq 25$ | $\geq 25$   | $\geq 25$   |
|                                             | MIN  | 64                          | 6.25                             | 1.56      | $\leq 0.39$ | $\leq 0.39$ |

314 Abbreviations: LVX, levofloxacin; TZP, piperacillin + tazobactam (8:1 ratio); MIN, minocycline; MIC, minimal  
 315 inhibitory concentration; MPC4, minimum potentiation concentration of the MBX compound that decreases the  
 316 MIC of the antibiotic by 4-fold.  
 317  
 318

319  
320  
321

**Table S3. Crystallographic data collection and refinement statistics. Values in parentheses are for the highest resolution shell.**

|                                              | Apo                                           | MBX2319                                       | MBX2931                                       | MBX3132                                       | MBX3135                                       | Rhodamine 6G                                  | Minocycline                                   |
|----------------------------------------------|-----------------------------------------------|-----------------------------------------------|-----------------------------------------------|-----------------------------------------------|-----------------------------------------------|-----------------------------------------------|-----------------------------------------------|
| pdb entry                                    | 5EN5                                          | 5ENO                                          | 5ENP                                          | 5ENQ                                          | 5ENR                                          | 5ENS                                          | 5ENT                                          |
| <b>Data collection</b>                       |                                               |                                               |                                               |                                               |                                               |                                               |                                               |
| Beamline                                     | SLS, PXIII                                    | SLS, PXIII                                    | Soleil, PX1                                   | Soleil, PX1                                   | SLS, PXIII                                    | SLS, PXIII                                    | DESY, P13                                     |
| Wavelength (Å)                               | 1.0000                                        | 0.97794                                       | 0.97857                                       | 0.97857                                       | 1.0000                                        | 1.0000                                        | 0.97625                                       |
| Temperature (K)                              | 100                                           | 100                                           | 100                                           | 100                                           | 100                                           | 100                                           | 100                                           |
| Resolution range (Å)                         | 50.0-2.3 (2.44-2.30)                          | 50.0-2.2 (2.33-2.20)                          | 50.0-1.9 (2.01-1.90)                          | 50.0-1.8 (1.91-1.80)                          | 50.0-2.3 (2.44-2.30)                          | 50.0-2.8 (2.97-2.80)                          | 50.0-2.5 (2.59-2.50)                          |
| Space group                                  | P2 <sub>1</sub> 2 <sub>1</sub> 2 <sub>1</sub> |
| Unit cell a, b, c (Å)                        | 108.29, 145.24, 174.37                        | 108.76, 145.15, 174.24                        | 108.65, 145.34, 174.22                        | 107.73, 145.52, 173.45                        | 109.07, 145.49, 174.24                        | 108.65, 145.24, 174.15                        | 109.56, 145.41, 175.61                        |
| Total reflections                            | 839239                                        | 1914247                                       | 1755111                                       | 2264342                                       | 843941                                        | 460613                                        | 87165                                         |
| Unique reflections                           | 122373                                        | 140556                                        | 216569                                        | 251472                                        | 122939                                        | 68419                                         | 96991                                         |
| Multiplicity                                 | 6.9 (6.8)                                     | 13.6 (12.2)                                   | 8.1 (7.9)                                     | 9.0 (8.7)                                     | 6.9 (7.0)                                     | 6.7 (6.6)                                     | 9.0 (8.9)                                     |
| Completeness (%) <sup>a)</sup>               | 99.3 (98.1)                                   | 99.7 (98.5)                                   | 99.6 (98.1)                                   | 99.8 (99.0)                                   | 99.7 (99.3)                                   | 99.7 (98.9)                                   | 99.3 (99.3)                                   |
| Mean I / $\sigma(I)$                         | 6.75 (1.31)                                   | 5.27 (0.92)                                   | 9.34 (1.08)                                   | 12.96 (1.08)                                  | 5.96 (1.32)                                   | 5.16 (1.19)                                   | 11.50 (1.45)                                  |
| $R_{\text{merge}}$ (%)                       | 19.1 (121.2)                                  | 30.7 (163.0)                                  | 11.6 (143.8)                                  | 10.6 (194.9)                                  | 22.4 (122.3)                                  | 28.5 (127.3)                                  | 16.2 (124.1)                                  |
| $R_{\text{meas}}$ (%)                        | 20.6 (121.2)                                  | 32.0 (158.7)                                  | 12.3 (137.4)                                  | 11.2 (179.0)                                  | 24.2 (122.9)                                  | 30.9 (130.1)                                  | 57.3 (131.8)                                  |
| Wilson B-factor (Å <sup>2</sup> )            | 30.15                                         | 27.03                                         | 29.86                                         | 30.55                                         | 26.34                                         | 38.82                                         | 44.9                                          |
| CC1/2 (%) <sup>a)</sup>                      | 98.7 (46.2)                                   | 98.4 (47.3)                                   | 99.7 (46.0)                                   | 99.9 (48.4)                                   | 98.0 (44.5)                                   | 95.8 (41.9)                                   | 99.7 (61.7)                                   |
| <b>Refinement</b>                            |                                               |                                               |                                               |                                               |                                               |                                               |                                               |
| Resolution range (Å)                         | 50.0-2.3 (2.44-2.30)                          | 50.0-2.2 (2.33-2.20)                          | 50.0-1.9 (2.01-1.90)                          | 50.0-1.8 (1.91-1.80)                          | 50.0-2.3 (2.44-2.30)                          | 50.0-2.8 (2.97-2.80)                          | 50.0-2.5 (2.59-2.50)                          |
| $R_{\text{work}}$                            | 0.1966 (0.2824)                               | 0.1991 (0.2793)                               | 0.1817 (0.3123)                               | 0.1819 (0.3217)                               | 0.1935 (0.2772)                               | 0.1948 (0.2935)                               | 0.1950 (0.3146)                               |
| $R_{\text{free}}$ <sup>b)</sup>              | 0.2486 (0.3300)                               | 0.2464 (0.3287)                               | 0.2215 (0.3253)                               | 0.2229 (0.3328)                               | 0.2401 (0.3152)                               | 0.2564 (0.3374)                               | 0.2559 (0.3600)                               |
| No. of non-H atoms                           | 17497                                         | 17885                                         | 18212                                         | 18265                                         | 17713                                         | 17010                                         | 17298                                         |
| Macromolecules                               | 16904                                         | 16871                                         | 16893                                         | 16875                                         | 16876                                         | 16724                                         | 16886                                         |
| Ligand                                       | -                                             | 29                                            | 37                                            | 35                                            | 36                                            | 33                                            | 40                                            |
| Water                                        | 593                                           | 985                                           | 1282                                          | 1355                                          | 801                                           | 253                                           | 372                                           |
| <b>Average B factor (Å<sup>2</sup>)</b>      |                                               |                                               |                                               |                                               |                                               |                                               |                                               |
| All atoms                                    | 36.2                                          | 32.7                                          | 35.0                                          | 37.0                                          | 32.0                                          | 42.9                                          | 52.3                                          |
| Macromolecule                                | 36.6                                          | 33.0                                          | 35.0                                          | 36.9                                          | 32.4                                          | 43.2                                          | 52.3                                          |
| Ligand                                       | -                                             | 52.4                                          | 52.2                                          | 29.7                                          | 27.4                                          | 59.7                                          | 76.2                                          |
| Water                                        | 26.3                                          | 26.6                                          | 34.9                                          | 38.4                                          | 24.4                                          | 22.7                                          | 37.4                                          |
| Ramachandran favored (%)                     | 96                                            | 97                                            | 97                                            | 97                                            | 97                                            | 97                                            | 96                                            |
| Ramachandran outliers (%)                    | 0.14                                          | 0.18                                          | 0.18                                          | 0.14                                          | 0.18                                          | 0.14                                          | 0.27                                          |
| RMSD, bonds (Å)                              | 0.015                                         | 0.016                                         | 0.018                                         | 0.018                                         | 0.016                                         | 0.011                                         | 0.013                                         |
| RMSD, angles (°)                             | 1.67                                          | 1.72                                          | 1.82                                          | 1.80                                          | 1.72                                          | 1.50                                          | 1.59                                          |
| MolProbity <sup>1</sup> clash score (see 37) | 1.40                                          | 1.22                                          | 1.82                                          | 1.94                                          | 1.25                                          | 1.86                                          | 1.13                                          |

<sup>a)</sup> Criterion for resolution cut-off: CC1/2 > 40%.

<sup>b)</sup> The same set of  $R_{\text{free}}$  reflections (5% of the apo dataset) was used for all datasets.

322  
323  
324  
325  
326

327 **Table S4. Differences in the thermodynamics of binding to the deep pocket in**  
 328 **AcrBper by MBX2931, MBX3132 and MBX3135 relative to MBX2319.** In the  
 329 second and third column the overall differences in free energies of binding ( $\Delta\Delta G_b$ )  
 330 and the differences (in kcal/mol) between the sum of contributions from residues of  
 331 the deep binding pocket ( $\Delta\Delta G_b^{DP}$ ) are reported, respectively. Cells from the fourth to  
 332 the last column report the differences in per-residue contributions to  $\Delta G_b$ , and are  
 333 colored from red (negative, increased contribution) to blue (positive, decreased  
 334 contribution). Residues contributing to the binding of all four MBX inhibitors are  
 335 underlined, and residues comprising the hydrophobic trap (36) are shown in bold.  
 336 The stabilization due to interaction of MBX compounds with the DP increases in  
 337 going from MBX2319 to MBX3135. In particular, the weight of the DP goes from ~  
 338 30% with MBX2931 to ~ 60% with MBX3135.

|                | $\Delta\Delta G_b$ | $\Delta\Delta G_b^{DP}$ | <u>F136</u> | V139 | <u>F178</u> | I277 | A279 | S287 | P326 | Y327 | V331 | M333 | <u>F610</u> | V612 | <u>F615</u> | F617 | <u>F628</u> |
|----------------|--------------------|-------------------------|-------------|------|-------------|------|------|------|------|------|------|------|-------------|------|-------------|------|-------------|
| <b>MBX2931</b> | <b>-5.0</b>        | <b>-1.6</b>             |             | 0.4  |             | -1.4 | 0.1  |      | 0.4  | -0.5 | -0.6 | 0.2  | 0.1         |      | -1.5        | 0.8  | 0.4         |
| <b>MBX3132</b> | <b>-5.9</b>        | <b>-3.4</b>             | 0.5         | 0.3  | -1.2        | -1.5 | -0.4 | -0.7 | 0.2  | -0.3 | -0.1 | -0.3 |             | -0.3 | 0.4         |      |             |
| <b>MBX3135</b> | <b>-6.9</b>        | <b>-4.2</b>             | 0.2         | 0.5  | -1.7        | -1.5 | -0.4 | -0.8 | 0.2  | -0.5 | -0.3 | 0.2  |             | -0.3 | 0.4         | 0.2  | -0.4        |

339  
340

341  
342

**Table S5. Bacterial strains that were used in this study.**

| <b>Organism</b>                          | <b>Strain</b> | <b>Genotype/Description</b>                                                                                                                                                                                       | <b>Source (Ref)</b>        |
|------------------------------------------|---------------|-------------------------------------------------------------------------------------------------------------------------------------------------------------------------------------------------------------------|----------------------------|
| <i>Escherichia coli</i>                  | AB1157        | <i>thr-1, araC14, leuB6(Am), Δ(gpt-proA)62, lacY1, tsx-33, qsr<sup>1</sup>-0, glnV44(AS), galk2(Oc), LAM-, Rac-0, hisG4(Oc), rfbC1, mgl-51, rpoS396(Am), rpsL31(strR), kdgK51, xylA5, mtl-1, argE3(Oc), thi-1</i> | (38)                       |
| <i>Escherichia coli</i>                  | 331           | CIP <sup>R</sup> , UTI isolate                                                                                                                                                                                    | Baylor College of Medicine |
| <i>Escherichia coli</i>                  | ATCC 700928   | UTI isolate                                                                                                                                                                                                       | ATCC#                      |
| <i>Escherichia coli</i>                  | HN1157        | F', <i>araD139, Δ(argF-lac)U169, rpsL150, rel-I, flb-5301, ptsF25, deoC1, thi-J, ΔlamB106, ΔompF80, zei06::Tn10, ompC124, acrR::Kan</i>                                                                           | (4)                        |
| <i>Enterobacter aerogenes</i>            | ATCC 13048    |                                                                                                                                                                                                                   | ATCC#                      |
| <i>Klebsiella pneumoniae</i>             | ATCC 700603   |                                                                                                                                                                                                                   | ATCC#                      |
| <i>Shigella flexneri</i>                 | ATCC 700930   |                                                                                                                                                                                                                   | ATCC#                      |
| <i>Salmonella enterica</i> (typhimurium) | MDCH06        |                                                                                                                                                                                                                   | BEI Resources              |
| <i>Pseudomonas aeruginosa</i>            | ATCC 27853    |                                                                                                                                                                                                                   | ATCC#                      |

343 #ATCC, American Type Culture Collection  
344  
345

346 **References:**

- 347
- 348 1. Nguyen ST, et al. (2015) Structure-activity relationships of a novel  
349 pyranopyridine series of Gram-negative bacterial efflux pump inhibitors. *Bioorg*  
350 *Med Chem* 23(9):2024–2034.
  - 351 2. Opperman TJ, et al. (2014) Characterization of a novel pyranopyridine inhibitor  
352 of the AcrAB efflux pump of Escherichia coli. *Antimicrob Agents Chemother*  
353 58(2):722–733.
  - 354 3. Coldham NG, Webber M, Woodward MJ, Piddock LJ V. (2010) A 96-well plate  
355 fluorescence assay for assessment of cellular permeability and active efflux in  
356 Salmonella enterica serovar Typhimurium and Escherichia coli. *J Antimicrob*  
357 *Chemother* 65(May):1655–1663.
  - 358 4. Nagano K, Nikaido H (2009) Kinetic behavior of the major multidrug efflux  
359 pump AcrB of Escherichia coli. *Proc Natl Acad Sci U S A* 106(14):5854–5858.
  - 360 5. Geertsma ER, Dutzler R (2011) A versatile and efficient high-throughput  
361 cloning tool for structural biology. *Biochemistry* 50(15):3272–3278.
  - 362 6. Shen A, et al. (2009) Simplified, enhanced protein purification using an  
363 inducible, autoprocessing enzyme tag. *PLoS One* 4(12):e8119.
  - 364 7. Sennhauser G, Amstutz P, Briand C, Storchenegger O, Grütter MG (2007)  
365 Drug export pathway of multidrug exporter AcrB revealed by DARPin  
366 inhibitors. *PLoS Biol* 5(1):e7.
  - 367 8. Kabsch W (2010) XDS. *Acta Crystallogr Sect D Biol Crystallogr*:125–132.
  - 368 9. McCoy AJ, et al. (2007) Phaser crystallographic software. *J Appl Crystallogr*  
369 40:658–674.
  - 370 10. Emsley P, Lohkamp B, Scott WG, Cowtan K (2010) Features and development  
371 of Coot. *Acta Crystallogr Sect D Biol Crystallogr* 66:486–501.
  - 372 11. Murshudov GN, et al. (2011) REFMAC5 for the refinement of macromolecular  
373 crystal structures. *Acta Crystallogr Sect D Biol Crystallogr* 67:355–367.
  - 374 12. Lebedev AA, et al. (2012) JLigand: A graphical tool for the CCP4 template-  
375 restraint library. *Acta Crystallogr Sect D Biol Crystallogr* 68:431–440.
  - 376 13. Vargiu A V., Ruggerone P, Opperman TJ, Nguyen ST, Nikaido H (2014)  
377 Inhibition of E. coli AcrB multidrug efflux pump by MBX2319: molecular  
378 mechanism and comparison with other inhibitors. *Antimicrob Agents*  
379 *Chemother* 58(10):6224–6234.
  - 380 14. Mallocci G, et al. (2015) A Database of Force-Field Parameters, Dynamics, and  
381 Properties of Antimicrobial Compounds. *Molecules* 20(8):13997–14021.
  - 382 15. Vargiu A V., Nikaido H (2012) Multidrug binding properties of the AcrB efflux  
383 pump characterized by molecular dynamics simulations. *Proc Natl Acad Sci U*  
384 *S A* 109(50):20637–20642.
  - 385 16. Wang J, Wolf RM, Caldwell JW, Kollman PA., Case DA. (2004) Development  
386 and testing of a general Amber force field. *J Comput Chem* 25(9):1157–1174.
  - 387 17. Case DA, et al. (2015) AMBER 2015.
  - 388 18. Frisch MJ, et al. (2009) Gaussian 09, Revision A.1.
  - 389 19. Jorgensen WL, Chandrasekhar J, Madura JD, Impey RW, Klein ML (1983)  
390 Comparison of simple potential functions for simulating liquid water. *J Chem*  
391 *Phys* 79(2):926–935.
  - 392 20. Joung IS, Cheatham TE (2008) Determination of alkali and halide monovalent  
393 ion parameters for use in explicitly solvated biomolecular simulations. *J Phys*  
394 *Chem B* 112(30):9020–9041.
  - 395 21. Berendsen HJC, Postma JPM, van Gunsteren WF, DiNola A, Haak JR (1984)

- 396 Molecular dynamics with coupling to an external bath. *J Chem Phys*  
397 81(8):3684–3690.
- 398 22. Feller SE, Zhang Y, Pastor RW, Brooks BR (1995) Constant pressure  
399 molecular dynamics simulation: The Langevin piston method. *J Chem Phys*  
400 103(11):4613–4621.
- 401 23. Miller BR, et al. (2012) MMPBSA.py: An efficient program for end-state free  
402 energy calculations. *J Chem Theory Comput* 8(9):3314–3321.
- 403 24. Kollman PA, et al. (2000) Calculating structures and free energies of complex  
404 molecules: Combining molecular mechanics and continuum models. *Acc*  
405 *Chem Res* 33(12):889–897.
- 406 25. Fogolari F, Brigo A, Molinari H (2002) The Poisson-Boltzmann equation for  
407 biomolecular electrostatics: A tool for structural biology. *J Mol Recognit*  
408 15(6):377–392.
- 409 26. Genheden S, Ryde U (2015) The MM/PBSA and MM/GBSA methods to  
410 estimate ligand-binding affinities. *Expert Opin Drug Discov*  
411 0441(November):1–13.
- 412 27. Shang Y, Nguyen H, Wickstrom L, Okur A, Simmerling C (2011) Improving the  
413 description of salt bridge strength and geometry in a Generalized Born model.  
414 *J Mol Graph Model* 29(5):676–684.
- 415 28. Onufriev A, Bashford D, Case DA (2004) Exploring protein native states and  
416 large-scale conformational changes with a modified generalized born model.  
417 *Proteins Struct Funct Bioinforma* 55(2):383–394.
- 418 29. Bondi A (1964) Van der Waals Volumes and Radii. *J Phys Chem* 68(3):441–  
419 451.
- 420 30. Tsui V, David A, Case DA (2000) Molecular Dynamics Simulations of Nucleic  
421 Acids with a Generalized Born Solvation Model. *J Am Chem Soc*  
422 122(11):2489–2498.
- 423 31. Weiser J, Shenkin PS, Still WC (1999) Approximate Atomic Surfaces from  
424 Linear Combinations of Pairwise. 20(2):217–230.
- 425 32. Gohlke H, Kiel C, Case DA (2003) Insights into protein-protein binding by  
426 binding free energy calculation and free energy decomposition for the Ras-Raf  
427 and Ras-RalGDS complexes. *J Mol Biol* 330(03):891–913.
- 428 33. Humphrey W, Dalke A, Schulten K (1996) VMD: Visual molecular dynamics. *J*  
429 *Mol Graph* 14(1):33–38.
- 430 34. Eicher T, et al. (2012) Transport of drugs by the multidrug transporter AcrB  
431 involves an access and a deep binding pocket that are separated by a switch-  
432 loop. *Proc Natl Acad Sci U S A* 109(15):5687–5692.
- 433 35. Murakami S, Nakashima R, Yamashita E, Matsumoto T, Yamaguchi A (2006)  
434 Crystal structures of a multidrug transporter reveal a functionally rotating  
435 mechanism. *Nature* 443(7108):173–179.
- 436 36. Nakashima R, et al. (2013) Structural basis for the inhibition of bacterial  
437 multidrug exporters. *Nature* 500(7460):102–106.
- 438 37. Chen VB, et al. (2010) MolProbity: All-atom structure validation for  
439 macromolecular crystallography. *Acta Crystallogr Sect D Biol Crystallogr*  
440 66(1):12–21.
- 441 38. DeWitt S, Adelberg E (1962) The occurrence of a genetic transposition in a  
442 strain of *Escherichia coli*. *Genetics* 47(May):577–685.
- 443
